# Supplementary material for: Synthesis and photophysical properties of 2′-deoxyguanosine derivatives labeled with fluorene and fluorenone units: toward excimer probes
Source: Royal Society of Chemistry journal article supplement (doi:10.1039/c3ra47383j), 2014-01-01
Supplement: c3ra47383j1.pdf [file c3ra47383j1.pdf]

**Synthesis and photophysical properties of 2'-deoxyguanosine derivatives labeled with fluorene and fluorenone units: Toward excimer probes**

Min Ji Kim,<sup>a</sup> Yujin Seo<sup>a</sup> and Gil Tae Hwang\*<sup>a</sup>

<sup>a</sup>*Department of Chemistry and Green-Nano Materials Research Center, Kyungpook National University, Daegu 702-701, Korea.*

*E-mail: giltae@knu.ac.kr; Fax: +82 53 950 6330; Tel.: +82 53 950 5331*

# Supplementary Information

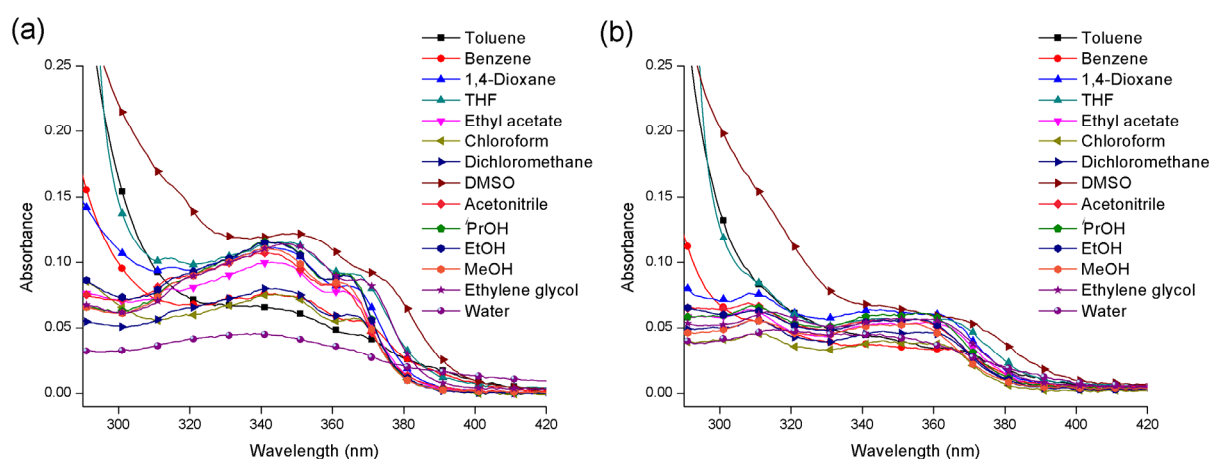

**Fig. S1** Absorption spectra of (a)  $G^{FL}$  and (b)  $G^{FO}$  in various solvents at 25 °C (all at 3  $\mu$ M concentration). All samples contained 0.5% DMSO to ensure solubility.

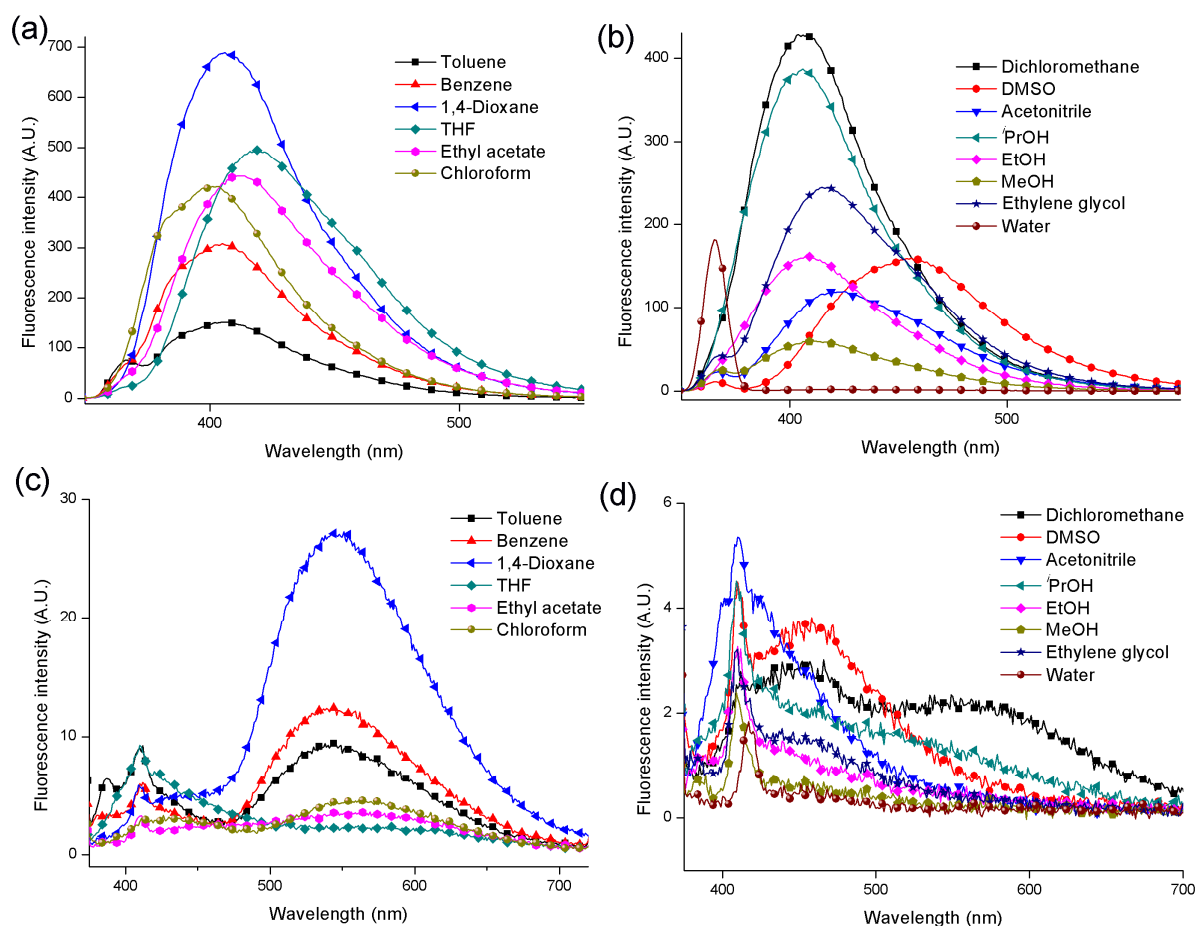

**Fig. S2** Emission spectra of (a)  $G^{FL}$  in relatively nonpolar solvents, (b)  $G^{FL}$  in relatively polar solvents, (c)  $G^{FO}$  in relatively nonpolar solvents, and (d)  $G^{FO}$  in relatively polar solvents at 25 °C (all at 3  $\mu$ M concentration). Excitation wavelength: 366 nm. All samples contained 0.5% DMSO to ensure solubility.

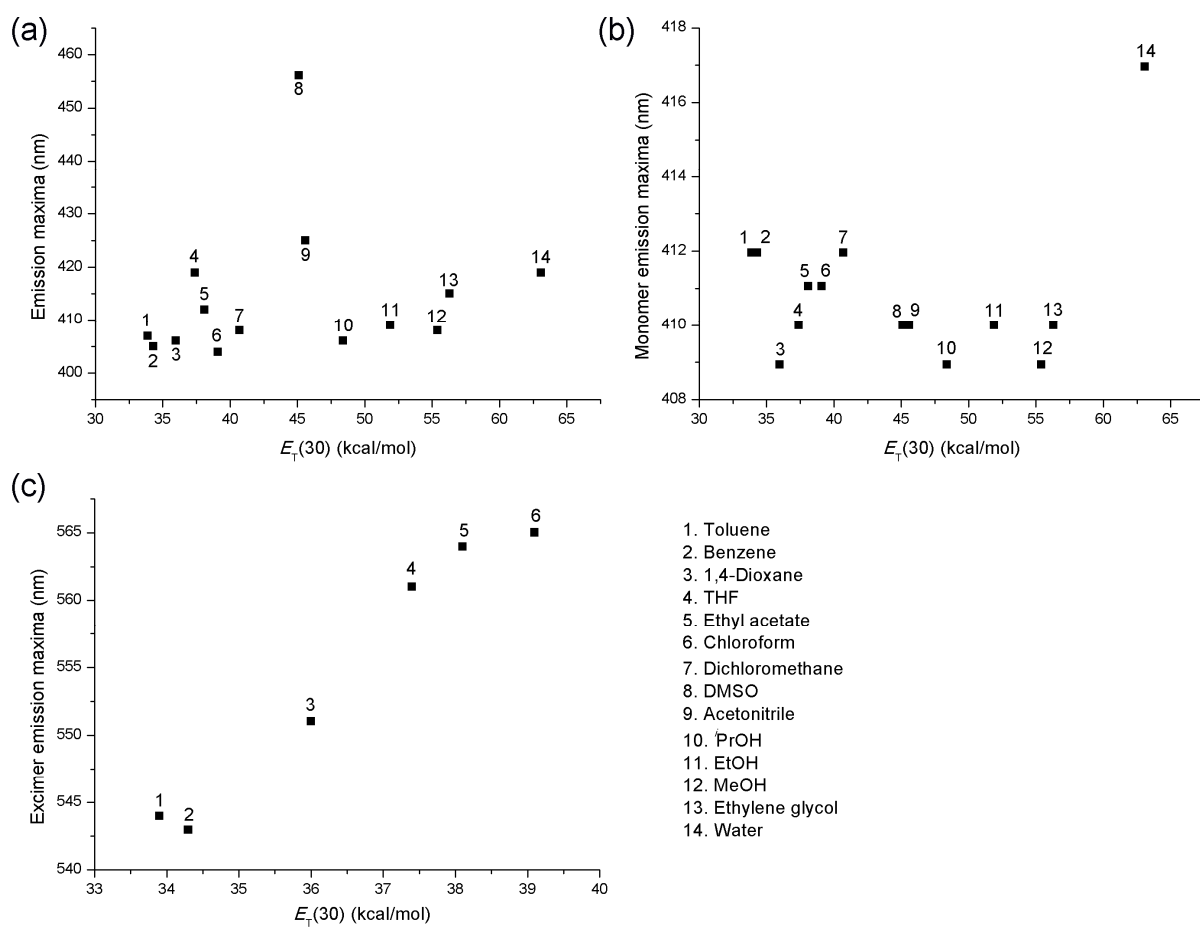

**Fig. S3** (a) Emission maxima of  $G^{FL}$ , (b) monomer emission maxima of  $G^{FO}$ , and (c) excimer emission maxima of  $G^{FO}$ , plotted with respect to values of  $E_T(30)$  of various solvents.

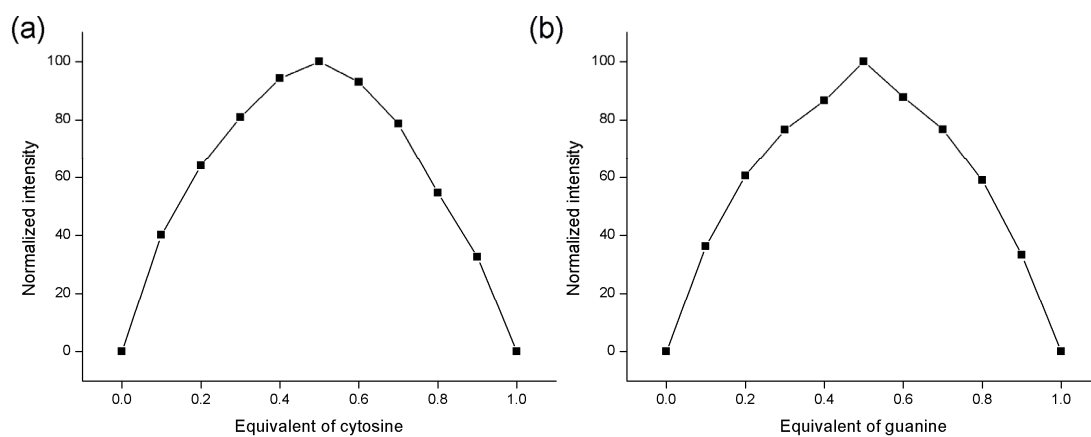

**Fig. S4** Fluorescence Job's plots for the interactions of  $G^{FO}$  with (a) cytosine (measured at 537 nm) and (b) guanine (measured at 540 nm) in 1,4-dioxane.

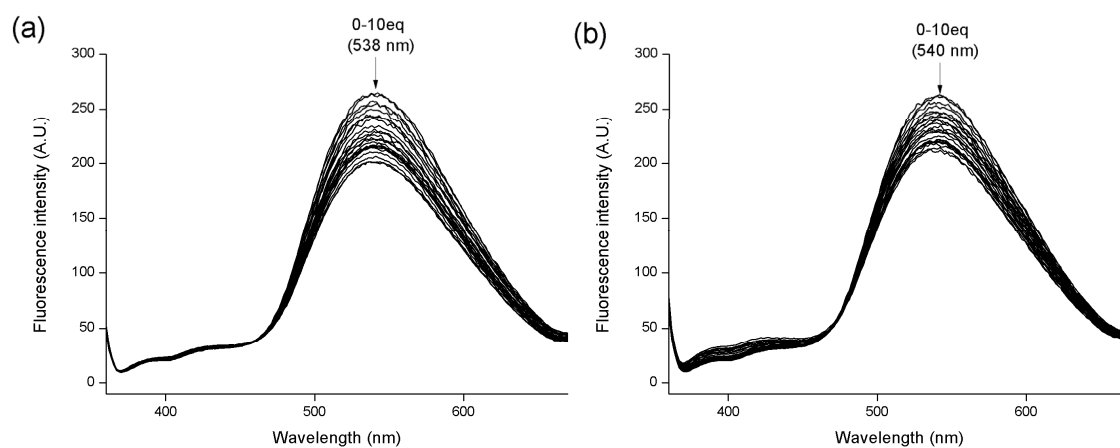

**Fig. S5** Fluorescence spectra of  $G^{FO}$  (3  $\mu$ M) in 1,4-dioxane containing various concentrations (0–30  $\mu$ M) of (a) thymine and (b) adenine ( $\lambda_{ex} = 345$  nm).

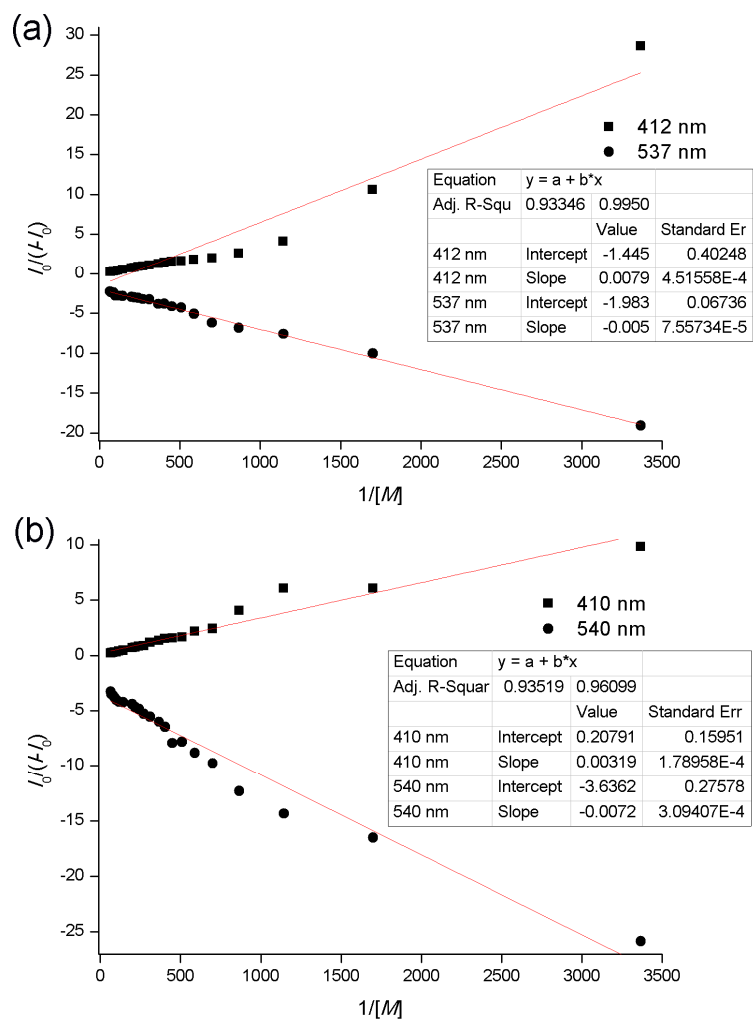

**Fig. S6** Linear regression curves of  $G^{FO}$  obtained using the (a) monomer emission band and (b) excimer emission band, obtained by plotting  $I_0/(I - I_0)$  with respect to the reciprocal of the nucleobase concentration ( $1/[M]$ ) in 1,4-dioxane ( $\lambda_{ex} = 345$  nm). Nucleobase: (a) cytosine; (b) guanine.

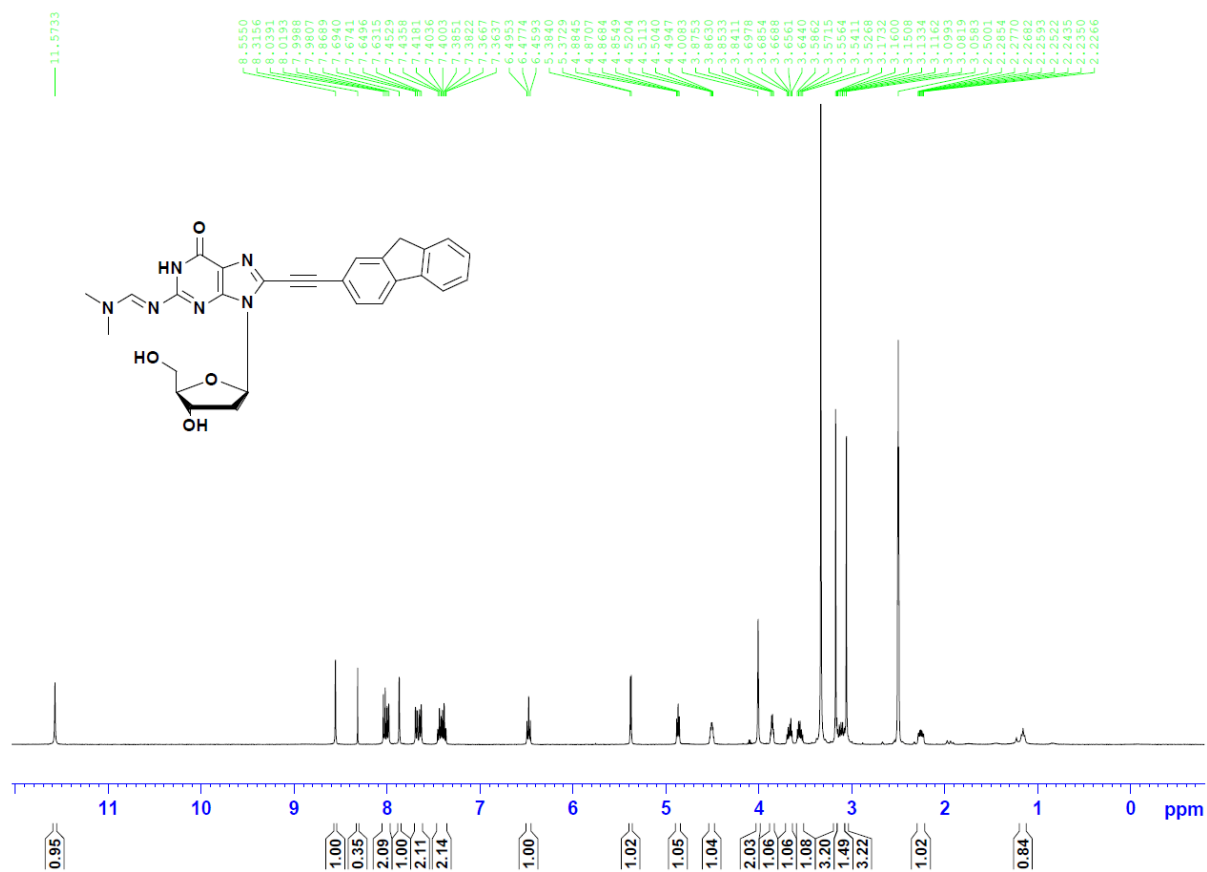

Fig. S7 <sup>1</sup>H NMR spectra of 2a.

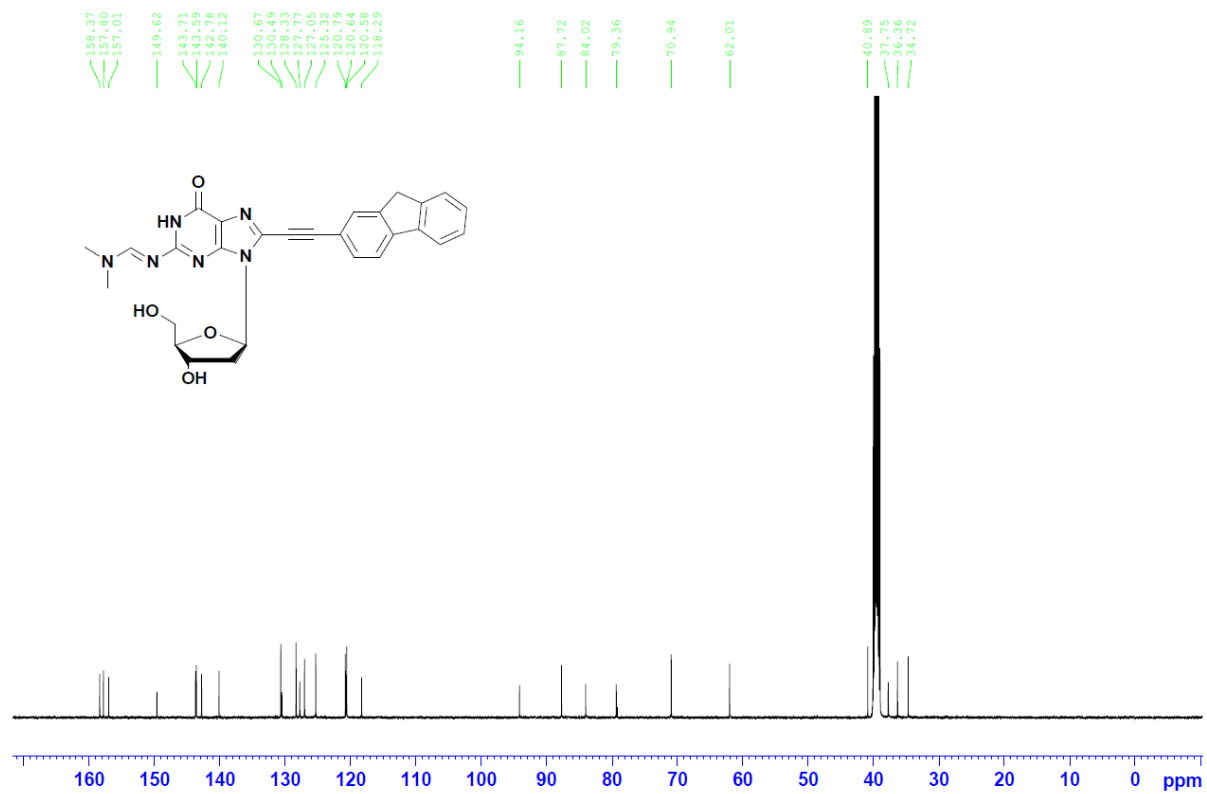

Fig. S8 <sup>13</sup>C NMR spectra of 2a.

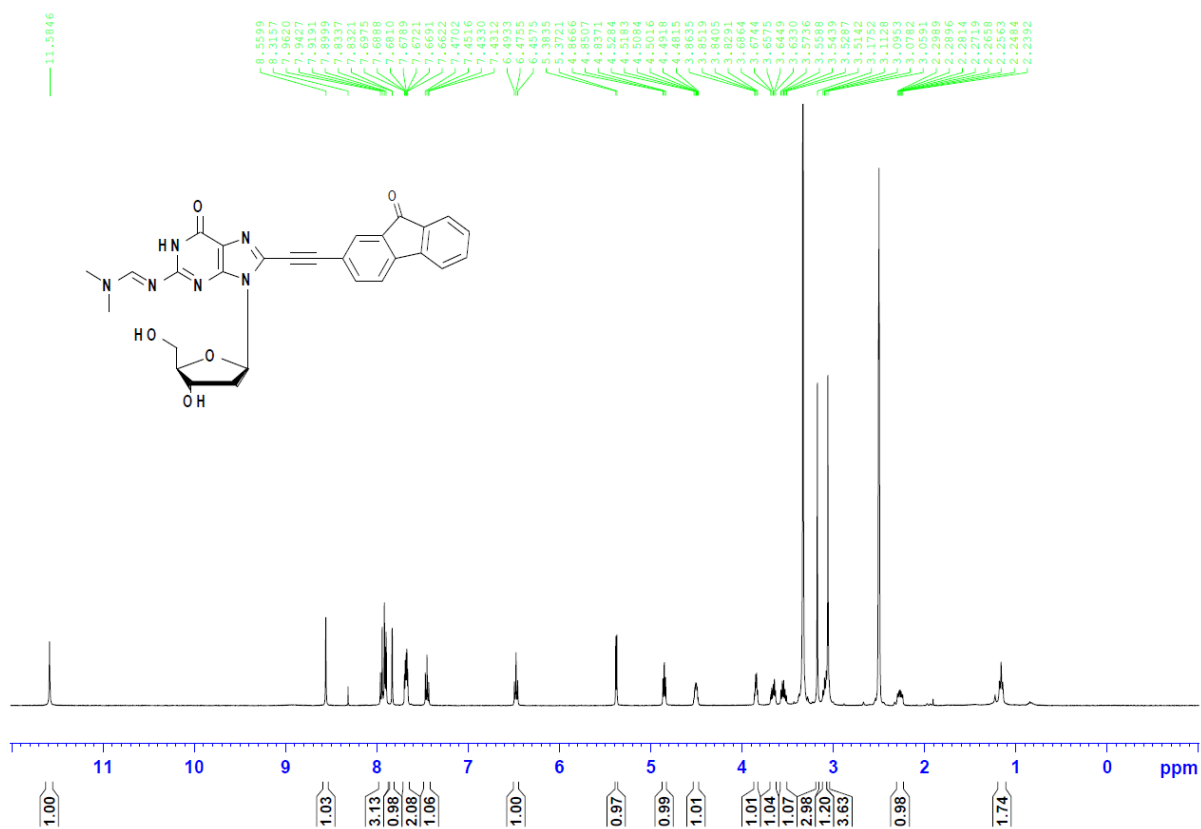

Fig. S9 <sup>1</sup>H NMR spectra of **2b**.

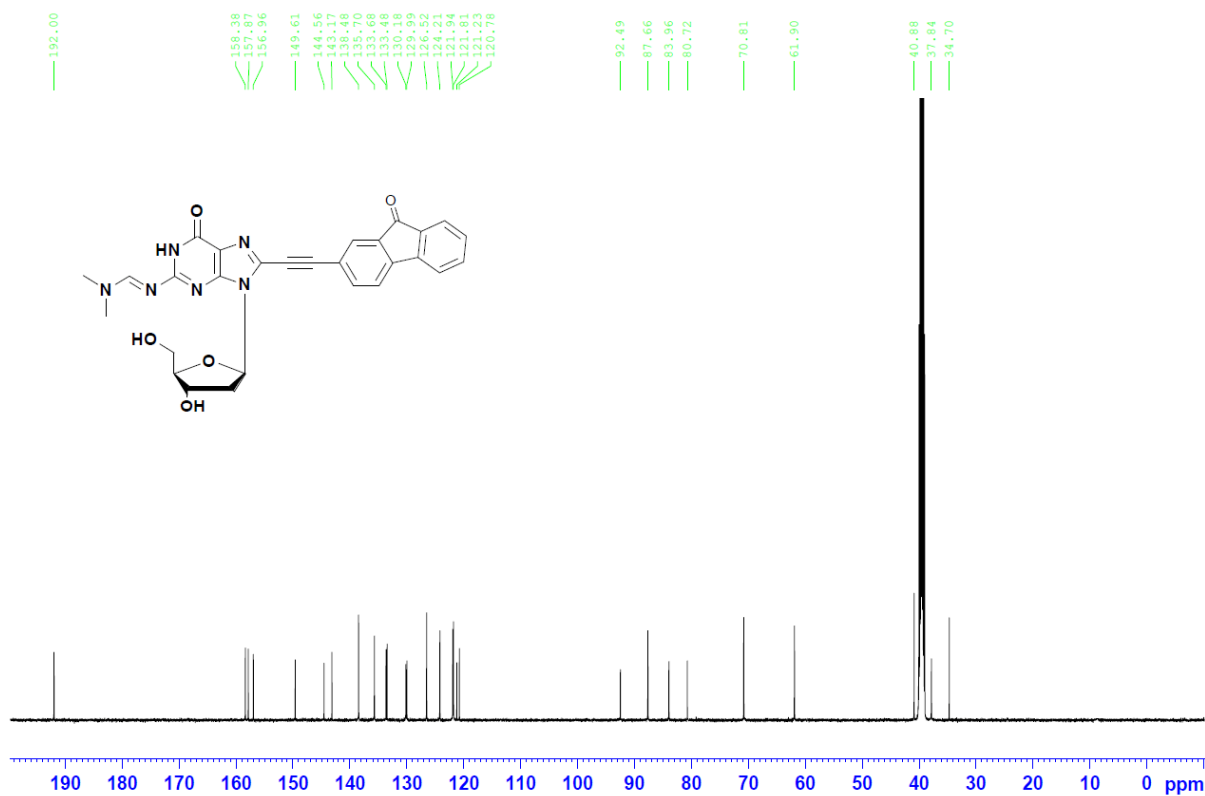

Fig. S10 <sup>13</sup>C NMR spectra of **2b**.

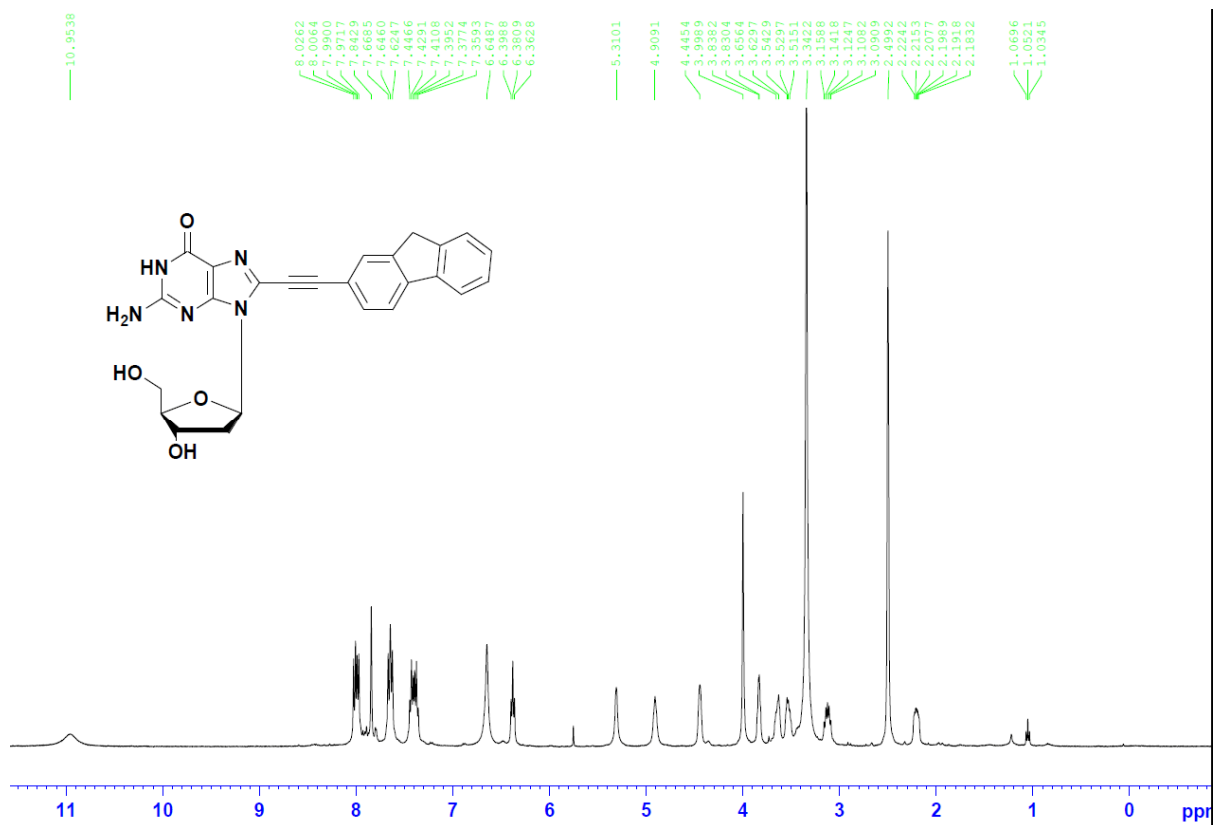

Fig. S11 <sup>1</sup>H NMR spectra of **3a**.

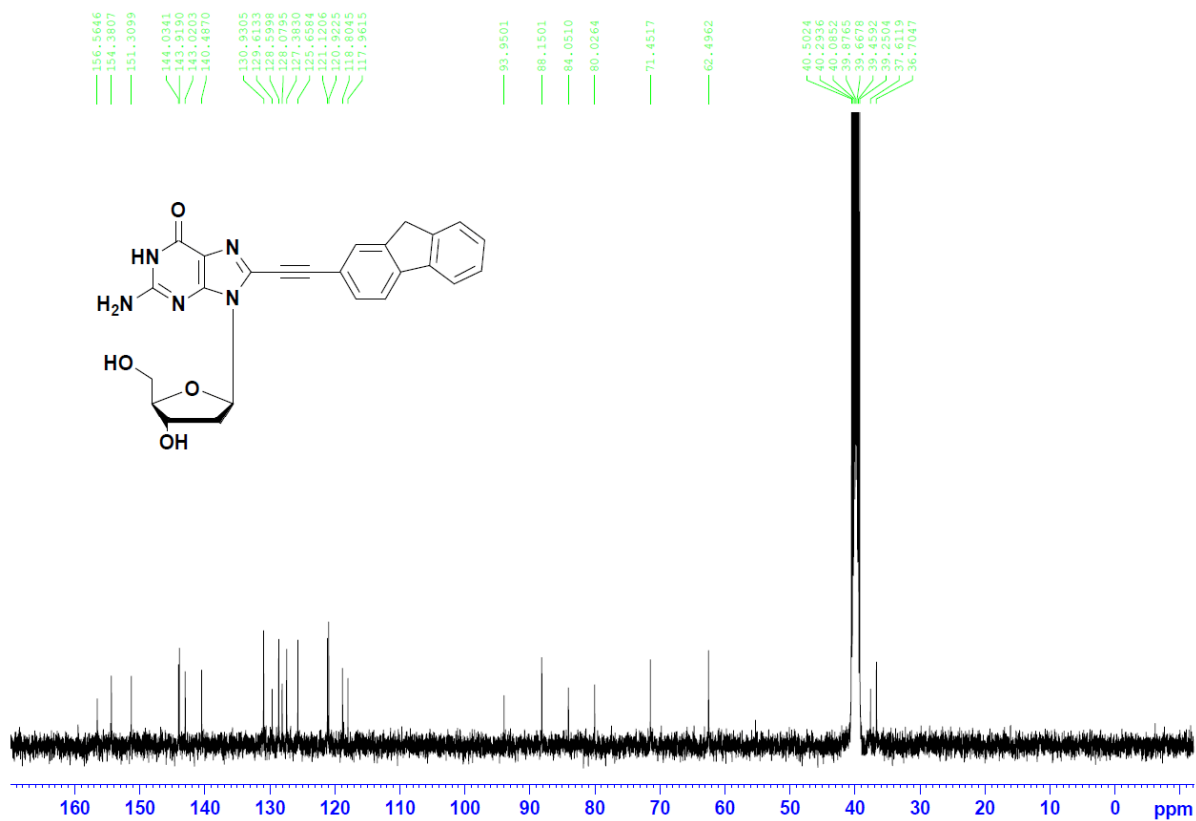

Fig. S12 <sup>13</sup>C NMR spectra of **3a**.



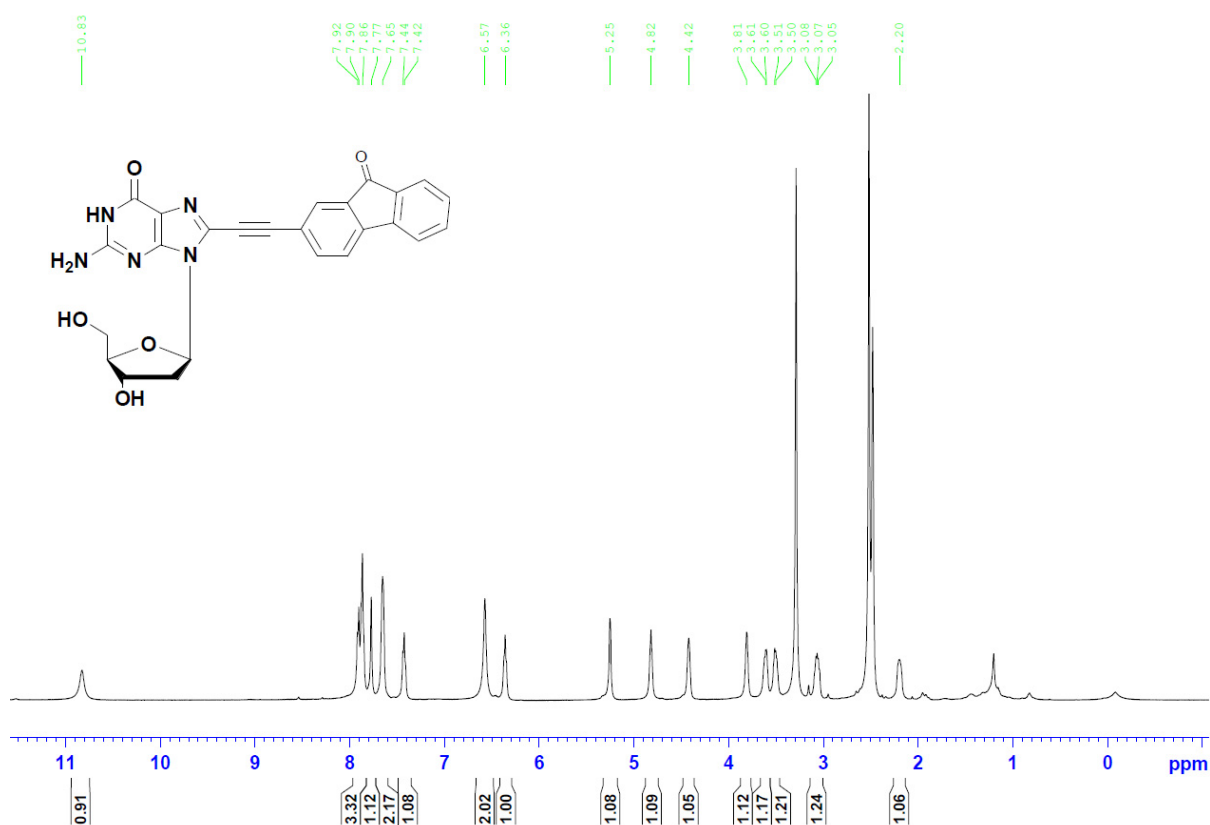

Fig. S13 <sup>1</sup>H NMR spectra of **3b**.

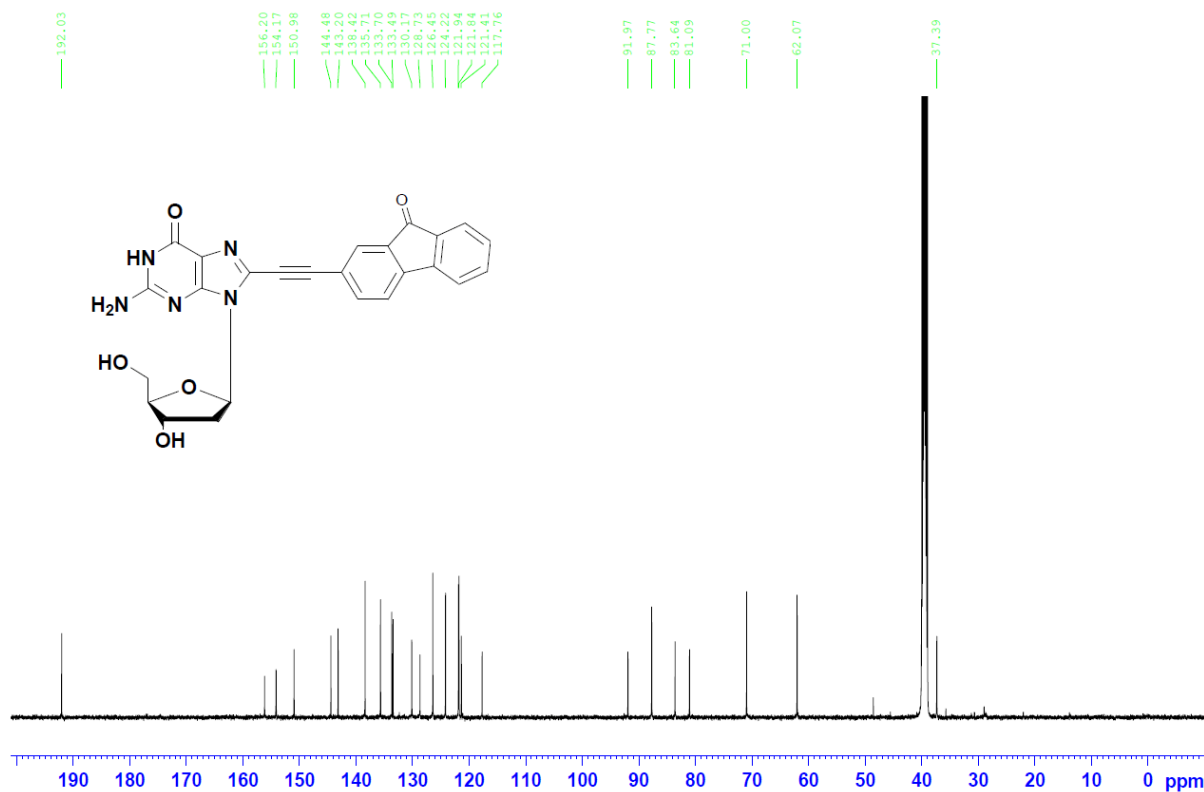

Fig. S14 <sup>13</sup>C NMR spectra of **3b**.
